# Supplementary material for: Loss of Hepatocyte-Nuclear-Factor-4α Affects Colonic Ion Transport and Causes Chronic Inflammation Resembling Inflammatory Bowel Disease in Mice
Source: PLoS One. 2009 Oct 29;4(10):e7609. doi: 10.1371/journal.pone.0007609 (PMC2764139; doi:10.1371/journal.pone.0007609)
Supplement: Table S1 — Inflammatory mediator profile in diseased Hnf4α null colon (0.02 MB XLS) [file pone.0007609.s002.xls]

## Sheet: Suppl Table 1
Supplementary Table 1 : Inflammatory mediator profile in diseased Hnf4a null colon
Gene	Controls	Mutants	Ratio	p-value
	(Mean ± SD)	(Mean ± SD)
CD30L	35,5 ± 25,03	455,75 ± 161,71	12.838	0.0826
Eotaxin (CCL11)	4186,00 ± 1908,09	4503,75 ± 1141,51	1.07591	0.8954
Eotaxin-2 (CCL24)	794,33 ± 119,19	1402, 75 ± 372,83	1.76595	0.2179
Fas	27,17 ± 14,04	870,13 ± 735,74	32.0291	0.5351
Fractalkine (CX3CL1)	564,67 ±150,97	752,00 ± 214,64	1.33176	0.5147
GCSF	447,3 ± 95,02	320,13 ± 38,08	0.71563	0.3399
GM-CSF	125,50 ± 51,70	527,75 ± 74,37	4.20518	0.0113
IFN-g	300,00 ± 84,07	1593,25 ± 1180,64	5.31083	0.3545
IL-1alpha	597,33 ± 175,06	2546,13 ± 798,45	4.26249	0.0973
IL-1beta	135,33 ± 20,69	453,38 ± 112,83	3.35006	0.0694
IL-2	1528,83 ± 1208,96	2455,75 ± 895,63	1.60629	0.5814
IL-3	181,67 ± 25,07	374,25 ± 90,72	2.06009	0.1333
IL-4	1455,67 ± 1176,55	370,00 ± 53,06	0.254179	0.4539
IL-6	85,17 ± 30,13	304,13 ± 61,91	3.57094	0.0335
IL-10	567,67 ± 493,32	827,38 ± 236,38	1.4575	0.6817
IL-12p40p70	22,17 ± 14,15	268,75 ± 66,67	12.1241	0.0363
IL-12p70	346,33 ± 183,79	543,13 ± 120,06	1.56821	0.4361
IL-13	223,67 ± 59,93	755,13 ± 104,07	3.37612	0.0115
IL-17	209,67 ± 86,24	1823,13 ± 625,41	8.69535	0.0835
I-TAC (CXCL11)	209,33 ± 64,92	724,38 ± 140,34	3.46039	0.0291
KC (CXCL1)	78,83 ± 19,96	354,50 ± 65,08	4.49683	0.0271
Leptin	123,33 ± 45,46	477,38 ± 108,03	3.87061	0.0567
LIX (CXCL5)	196,33 ± 96,98	873,0 ± 169,00	4.44652	0.0255
Lymphotactin (XCL1)	306,00 ± 143,93	935,13 ± 198,08	3.05596	0.062
MCP-1 (CCL2)	109,50 ± 14,00	218,63 ± 43,10	1.99658	0.0952
MCSF	100,17 ± 41,16	592,50 ± 189,41	5.91514	0.0847
MIG (CXCL9)	122,00 ± 27,27	393,25 ± 76,99	3.22336	0.045
MIP-1alpha (CCL3)	108,67 ± 30,49	281,13 ± 51,70	2.58704	0.0453
MIP-1gamma (CCL9)	21774,17 ± 2083,51	24224,50 ± 7639,58	1.11253	0.7772
RANTES (CCL5)	552,83 ± 280,78	1835,75 ± 709,21	3.32062	0.1912
SDF-1 (CXCL12)	905,67 ± 618,64	2757,13 ± 1125,30	3.0443	0.2228
TCA-3 (CCL1)	192,83 ± 44,76	1724,63 ± 566,30	8.94361	0.074
TECK (CCL25)	90,17 ± 46,23	378,25 ± 28,60	4.19501	0.0131
TIMP-1	876,83 ± 294,83	1372,38 ± 181,07	1.56515	0.2475
TIMP-2	189,17 ± 43,73	654,25 ± 126,62	3.45859	0.0403
TNF-alpha	239,67 ± 8,01	611,50 ± 73,02	2.55146	0.0149
STNF-RI	8162,17 ± 879,65	8909,88 ± 2228,39	1.09161	0.7754
STNF-RII	1891,50 ± 271,02	2923,50 ±838,30	1.5456	0.326
1 Ratio of 3 to 4 Hnf4alpha mutants/ 3 to 4 controls; measurements done in duplicate
2 unpaired t test Welch’s corrected
